# Supplementary material for: An interfacial defect-controlled ZnO/PbS QDs/ZnS heterostructure based broadband photodetector
Source: Royal Society of Chemistry journal article supplement (doi:10.1039/c6ra14574d), 2016-01-01
Supplement: c6ra14574d1.pdf [file c6ra14574d1.pdf]

Electronic Supplementary Material (ESI) for RSC Advances

This journal is © The Royal Society of Chemistry 2012

## Interfacial defect-controlled ZnO/PbS QDs/ZnS heterostructure based broadband photodetector

Haili Li, Shujie Jiao, Hongtao Li, Shiyong Gao, Jinzhong Wang, Dongbo Wang, Qingjiang Yu, Yong Zhang, Lin Li, Haitao Zhou

### Supporting information

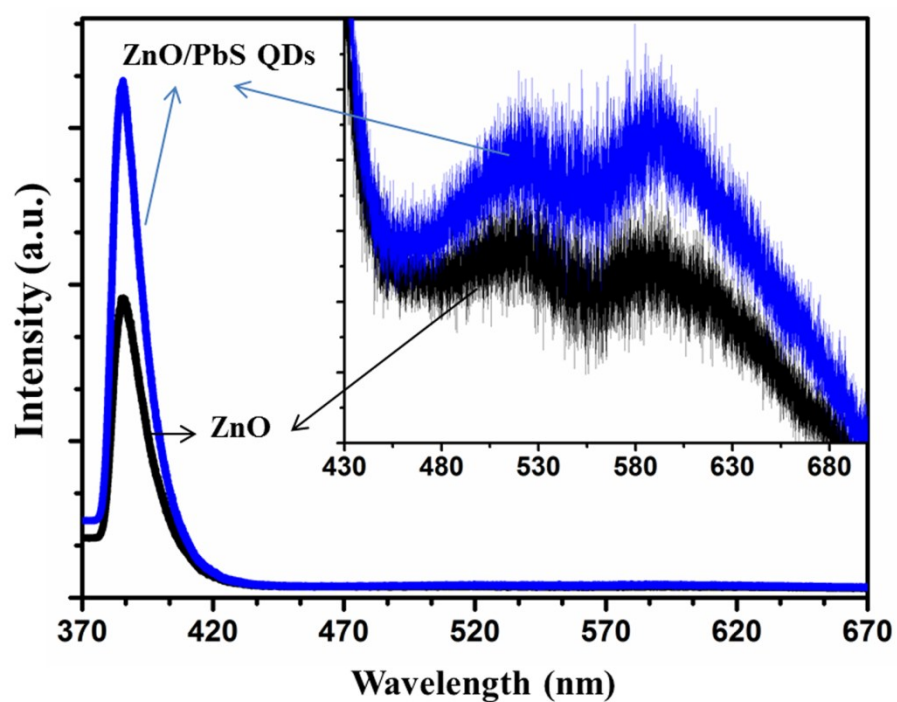

Fig. 1 PL spectrum of ZnO and ZnO/PbS QDs formed by SILAR method with aqueous-containing solution as solvents. Inset is the enlarged spectrum of their visible light emission.
